# Supplementary material for: Darolutamide antagonizes androgen signaling by blocking enhancer and super‐enhancer activation
Source: PubMed Central journal article supplement (PMC7463324; doi:10.1002/1878-0261.12693), 2020-06-05
Supplement: MOL2-14-2022-s001.pdf [file MOL2-14-2022-s001.pdf]

# Supplementary Files

## Figure Legends

**Fig. S1.** Gene Set Enrichment Analysis of the transcriptional impact of darolutamide compared to the R1881 stimulation at the mentioned time points and concentrations in VCaP and LAPC4 cells. Hallmark gene sets were selected as mentioned in Fig 1.

**Fig. S2.** (A) Heatmaps showing signals of single AR ChIP-seq replicates centered at R1881-induced AR-binding sites including a 2.5 kb region up- and downstream. The signals are arranged in a descending order based on the R1881 sample signal. (B) Overlap of the defined AR-binding groups in LAPC4 and VCaP cells sorted by the ratio given in percentage of overlapping regions relative to all regions in the respective LAPC4 group. (C) Motif analysis of the AR-binding clusters identified in Fig. 2B shown in a word cloud for the VCaP and LAPC4 cells in the upper and lower panels, respectively. Word size corresponds to absolute z-scores of the motif enrichment. Motif colors correspond to DNA-binding domain families.

**Fig. S3.** AR ChIP-seq signals in healthy prostate and PCa tissue samples are shown with heatmaps and centered around the AR groups identified in VCaP cells (Fig. 2). The green and red boxes highlight healthy and PCa tissue samples, respectively. The AR occupancy intensity scale is shown on the right hand side beside each heatmap and scaled uniformly between all samples. Data are taken from GSE96652.

**Fig. S4.** (A) ChIP-seq signals of replicates for the DMSO, R1881 and darolutamide plus R1881 conditions centered at AR-binding regions plus 2.5 kb up and downstream for AR groups identified in VCaP cells. Regions are sorted in descending order based on data from the R1881-treated samples. (B) Heatmaps of ChIP-seq signals from LAPC4 cells with averaged profiles for DMSO-, R1881- and R1881- plus darolutamide-treated samples at genomic regions bound by the AR after R1881 induction. Regions are sorted to the R1881 condition in descending AR-binding intensity. (C) Heatmaps of ChIP-seq signals from VCaP cells with averaged profiles for DMSO-, R1881- and R1881- plus darolutamide-treated samples at genomic regions bound by the AR after R1881 induction. Regions are sorted to the R1881 condition in descending AR-binding intensity.

**Fig. S5.** (A) Average signal plots of FOXA1 ChIP-seq data in the identified LAPC4 cell groups. ChIP-seq data were retrieved from GSE123625. (B) BRD4 ChIP-seq signals in VCaP cells at the AR-binding groups defined in Fig. 2A are shown after treatment with DMSO or dihydrotestosterone (DHT). Samples were retrieved from GSE55062.

# Supplementary Files

## Table Legends

**Table S1.** List of antibodies used in ChIP-seq experiments.

**Table S2.** GSEA output of hallmark gene sets enriched among the genes differentially expressed between darolutamide 2  $\mu$ M + 1 nM R1881-treated VCaP vs 1 nM R1881-treated samples at 22 h post treatment.

**Table S3** GSEA output of hallmark gene sets enriched among the genes differentially expressed between darolutamide 2  $\mu$ M + 1 nM R1881-treated VCaP vs 1 nM R1881-treated samples 8 h post treatment.

**Table S4.** GSEA output of hallmark gene sets enriched among the genes differentially expressed between darolutamide 500 nM + 1 nM R1881-treated VCaP vs 1 nM R1881-treated samples 22 h post treatment.

**Table S5.** GSEA output of hallmark gene sets enriched among the genes differentially expressed between darolutamide 500 nM + 1 nM R1881-treated VCaP vs 1 nM R1881-treated samples 8 h post treatment.

**Table S6.** GSEA output of hallmark gene sets enriched among the genes differentially expressed between darolutamide 2  $\mu$ M + 1 nM R1881-treated LAPC4 vs 1 nM R1881-treated samples 22 h post treatment.

**Table S7.** GSEA output of hallmark gene sets enriched among the genes differentially expressed between darolutamide 2  $\mu$ M + 1 nM R1881-treated LAPC4 vs 1 nM R1881-treated samples 8 h post treatment.

**Table S8.** GSEA output of hallmark gene sets enriched among the genes differentially expressed between darolutamide 500 nM + 1 nM R1881-treated LAPC4 vs 1 nM R1881-treated samples 22 h post treatment.

**Table S9.** GSEA output of hallmark gene sets enriched among the genes differentially expressed between darolutamide 500 nM + 1 nM R1881-treated LAPC4 vs 1 nM R1881-treated samples 8 h post treatment.

**Table S10.** Location of constitutive AR-binding sites found under all treatment conditions in VCaP and LAPC4 cells and corresponding genes identified based on AR peak location within 20 kbp upstream of the TSS or in the gene body (See also Fig. S2B).

**Table S11.** Analysis of genes proximal to the AR-binding regions identified in VCaP and LAPC4 cells by GREAT analysis. Significantly enriched gene sets with a FDR < 0.05 are shown and ordered by log<sub>10</sub>(binominal p-val.). The upper part shows enriched sets from VCaP cells and the lower panel enriched sets from LAPC4 cells.

**Table S12.** MSigDB sets of genes associated with SEs in VCaP cells analyzed by GREAT. Statistical enrichment scores are shown.

# Suppl. Fig. S1

## VCaP

08 h 2  $\mu$ M darolutamide + 1 nM R1881

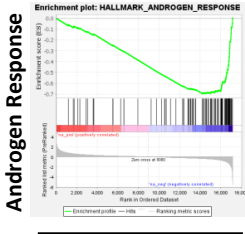

|                                   |       |
|-----------------------------------|-------|
| Normalized Enrichment Score (NES) | -2.60 |
| Nominal p-value                   | 0     |
| FDR q-value                       | 0     |

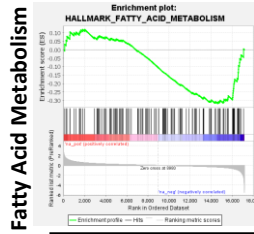

|                                   |       |
|-----------------------------------|-------|
| Normalized Enrichment Score (NES) | -1.21 |
| Nominal p-value                   | 0.12  |
| FDR q-value                       | 0.22  |

PI3K AKT mTOR Signaling

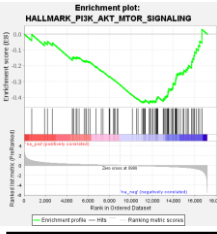

|                                   |       |
|-----------------------------------|-------|
| Normalized Enrichment Score (NES) | -1.60 |
| Nominal p-value                   | 0.01  |
| FDR q-value                       | 0.03  |

## LAPC4

08 h 2  $\mu$ M darolutamide + 1 nM R1881

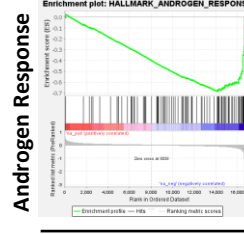

|                                   |       |
|-----------------------------------|-------|
| Normalized Enrichment Score (NES) | -2.31 |
| Nominal p-value                   | 0     |
| FDR q-value                       | 0     |

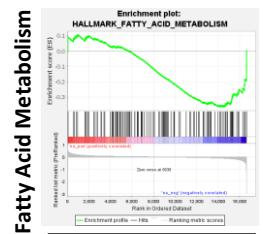

|                                   |      |
|-----------------------------------|------|
| Normalized Enrichment Score (NES) | 1.27 |
| Nominal p-value                   | 0.07 |
| FDR q-value                       | 0.40 |

08 h 500 nM darolutamide + 1 nM R1881

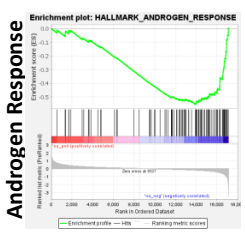

|                                   |       |
|-----------------------------------|-------|
| Normalized Enrichment Score (NES) | -2.08 |
| Nominal p-value                   | 0     |
| FDR q-value                       | 0     |

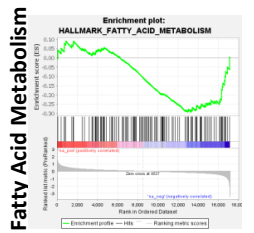

|                                   |       |
|-----------------------------------|-------|
| Normalized Enrichment Score (NES) | -1.15 |
| Nominal p-value                   | 0.19  |
| FDR q-value                       | 0.31  |

PI3K AKT mTOR Signaling

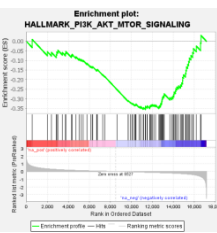

|                                   |       |
|-----------------------------------|-------|
| Normalized Enrichment Score (NES) | -1.31 |
| Nominal p-value                   | 0.07  |
| FDR q-value                       | 0.12  |

08 h 500 nM darolutamide + 1 nM R1881

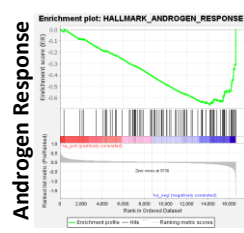

|                                   |       |
|-----------------------------------|-------|
| Normalized Enrichment Score (NES) | -2.17 |
| Nominal p-value                   | 0     |
| FDR q-value                       | 0     |

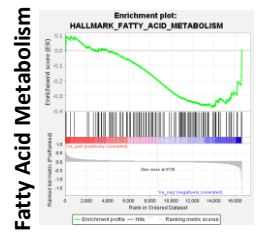

|                                   |       |
|-----------------------------------|-------|
| Normalized Enrichment Score (NES) | -1.29 |
| Nominal p-value                   | 0.06  |
| FDR q-value                       | 0.57  |

22 h 500 nM darolutamide + 1 nM R1881

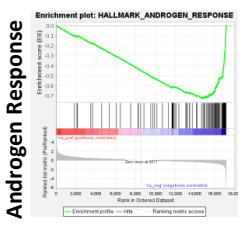

|                                   |       |
|-----------------------------------|-------|
| Normalized Enrichment Score (NES) | -3.04 |
| Nominal p-value                   | 0     |
| FDR q-value                       | 0     |

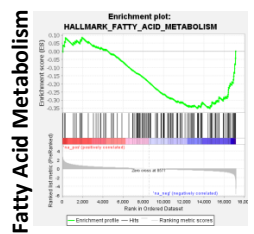

|                                   |       |
|-----------------------------------|-------|
| Normalized Enrichment Score (NES) | -1.57 |
| Nominal p-value                   | 0     |
| FDR q-value                       | 0.03  |

PI3K AKT mTOR Signaling

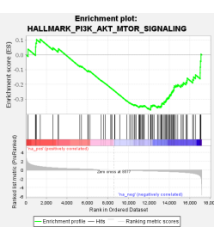

|                                   |       |
|-----------------------------------|-------|
| Normalized Enrichment Score (NES) | -1.53 |
| Nominal p-value                   | 0     |
| FDR q-value                       | 0.03  |

22 h 500 nM darolutamide + 1 nM R1881

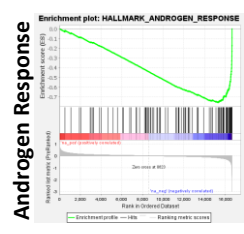

|                                   |       |
|-----------------------------------|-------|
| Normalized Enrichment Score (NES) | -2.69 |
| Nominal p-value                   | 0     |
| FDR q-value                       | 0     |

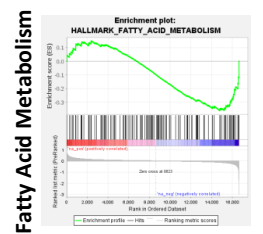

|                                   |       |
|-----------------------------------|-------|
| Normalized Enrichment Score (NES) | -1.35 |
| Nominal p-value                   | 0.036 |
| FDR q-value                       | 0.14  |

# Suppl. Fig. S2

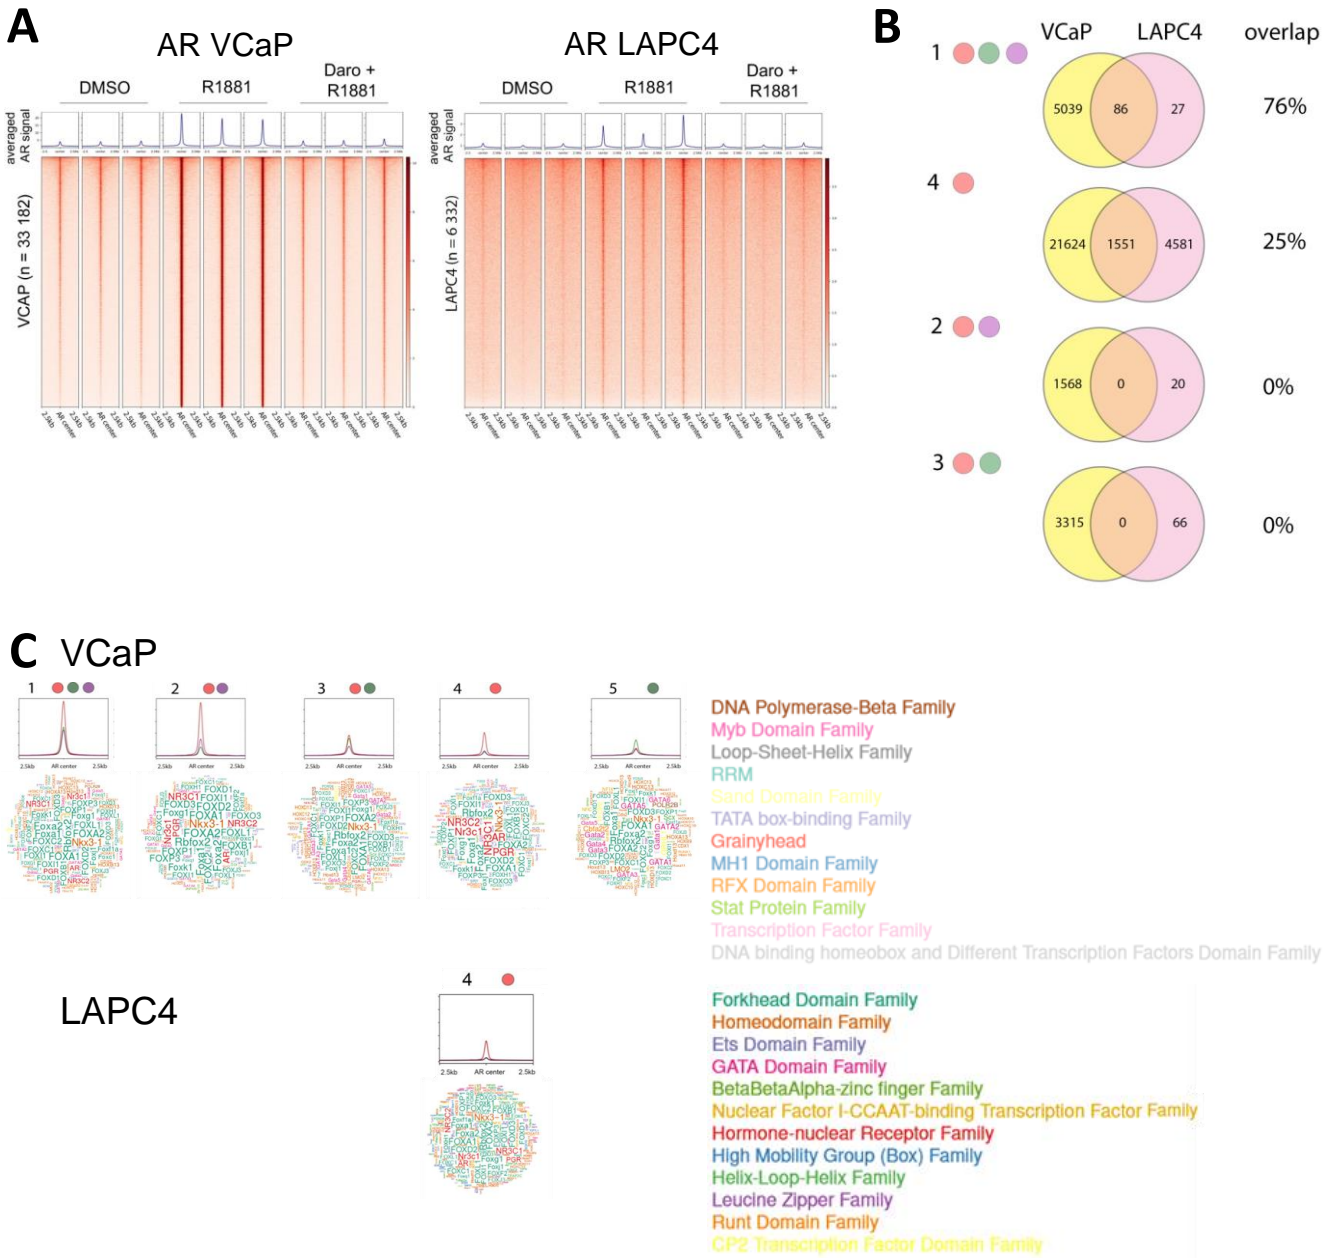

# Suppl. Fig. S3

AR binding cluster

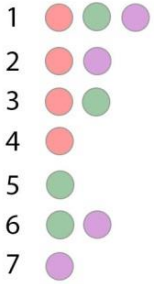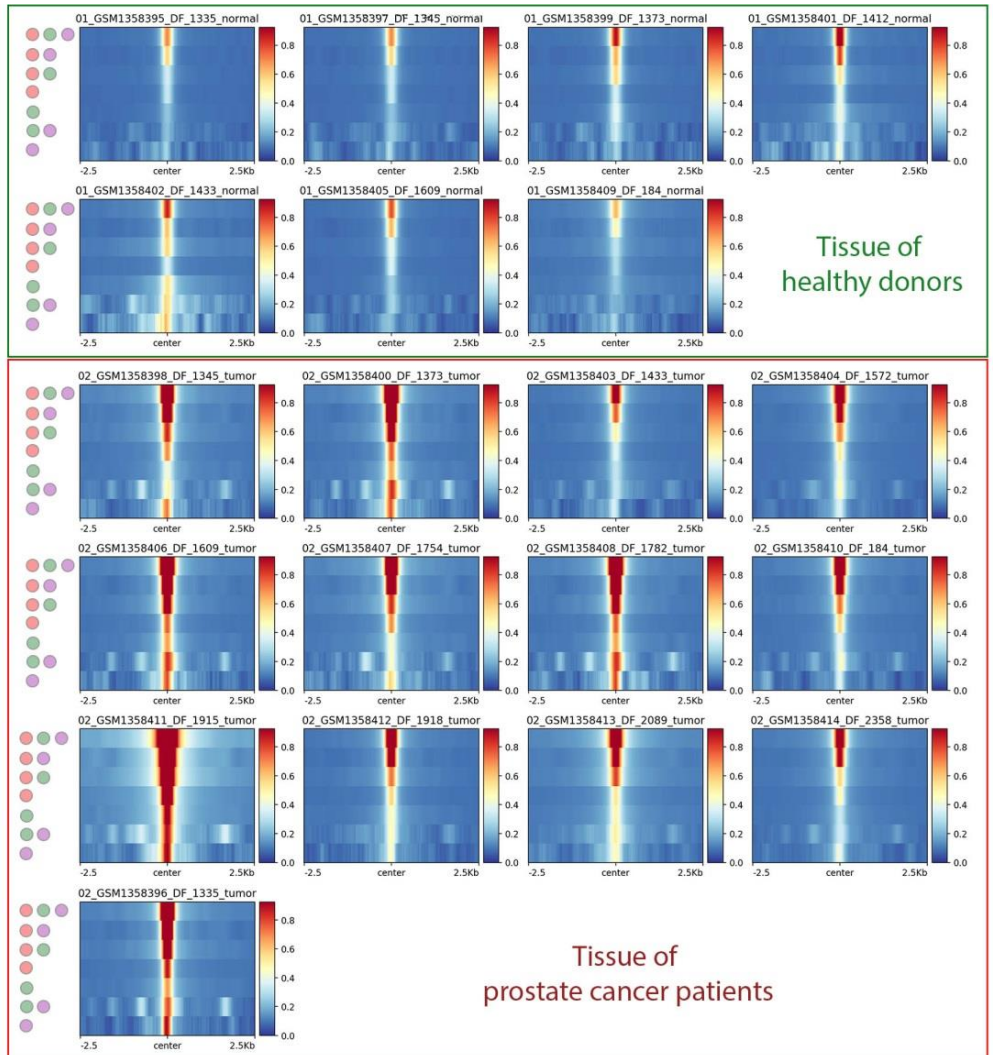

# Suppl. Fig. S4

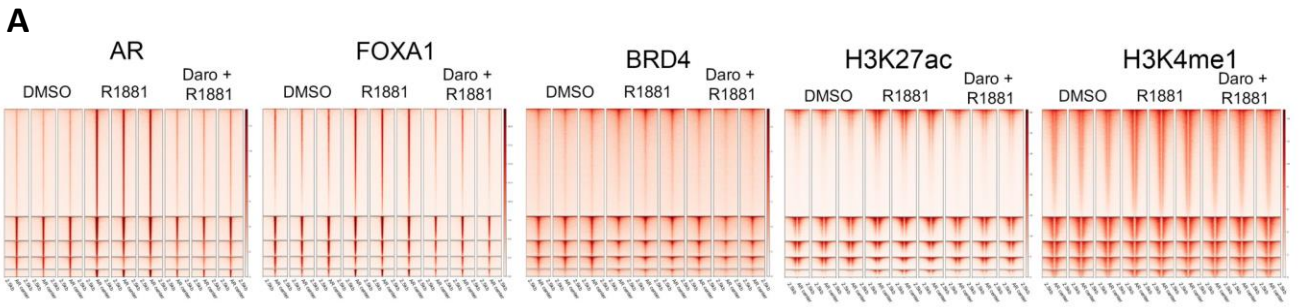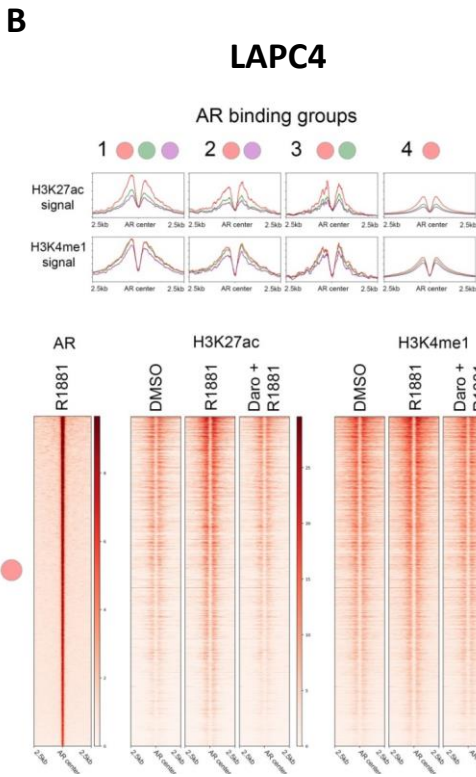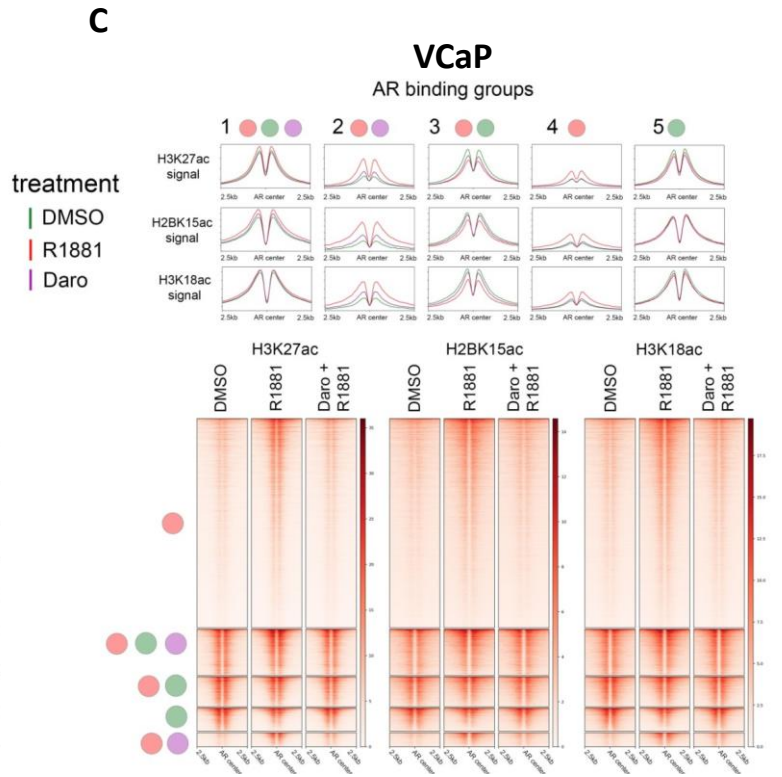

# Suppl. Fig. S5

## A LAPC4

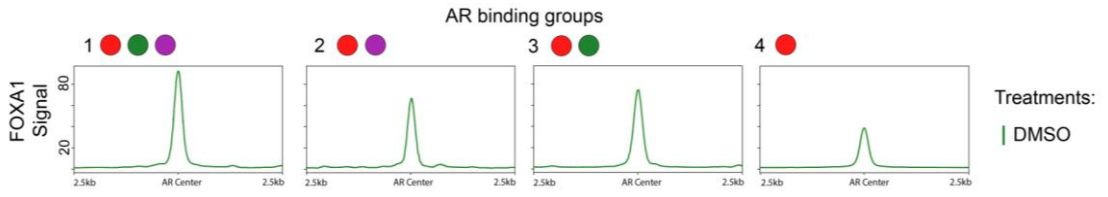

## B VCaP

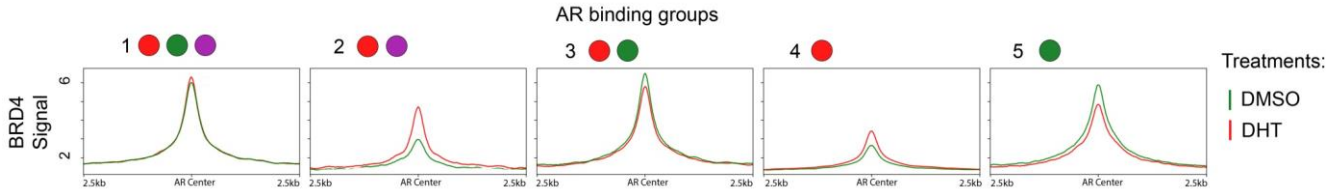

## Suppl. Table S1

| Target protein | Vendor              | Catalog number |
|----------------|---------------------|----------------|
| AR             | Abcam               | ab74272        |
| BRD4           | Bethyl Laboratories | A301-985A100   |
| FOXA1          | Abcam               | ab23738        |
| MED1           | Bethyl Laboratories | A300-793A      |
| RNAPII         | Abcam               | ab26721        |
| H3K27ac        | Diagenode           | C15410196      |
| H3K4me1        | Diagenode           | C15410194      |
| H3K18ac        | Diagenode           | C15410139      |
| H2BK15ac       | Diagenode           | C15410220      |



## Suppl. Table S2

VCaP.daroHigh.R1881.22h

DOWN-regulated pathways

| NAME                               | ES    | NES   | NOM p-val | FDR q-val |
|------------------------------------|-------|-------|-----------|-----------|
| HALLMARK_ANDROGEN_RESPONSE         | -0.76 | -3.12 | 0.00      | 0.00      |
| HALLMARK_PROTEIN_SECRETION         | -0.50 | -2.08 | 0.00      | 0.00      |
| HALLMARK_PI3K_AKT_MTOR_SIGNALING   | -0.45 | -1.82 | 0.00      | 0.00      |
| HALLMARK_HYPOXIA                   | -0.40 | -1.76 | 0.00      | 0.01      |
| HALLMARK_CHOLESTEROL_HOMEOSTASIS   | -0.45 | -1.74 | 0.00      | 0.01      |
| HALLMARK_TNFA_SIGNALING_VIA_NFKB   | -0.37 | -1.61 | 0.00      | 0.02      |
| HALLMARK_FATTY_ACID_METABOLISM     | -0.37 | -1.60 | 0.00      | 0.02      |
| HALLMARK_ESTROGEN_RESPONSE_LATE    | -0.36 | -1.59 | 0.00      | 0.02      |
| HALLMARK_UNFOLDED_PROTEIN_RESPONSE | -0.37 | -1.57 | 0.00      | 0.02      |
| HALLMARK_ESTROGEN_RESPONSE_EARLY   | -0.33 | -1.50 | 0.01      | 0.03      |
| HALLMARK_MTORC1_SIGNALING          | -0.33 | -1.49 | 0.00      | 0.03      |
| HALLMARK_BILE_ACID_METABOLISM      | -0.35 | -1.41 | 0.03      | 0.06      |
| HALLMARK_ADIPOGENESIS              | -0.29 | -1.33 | 0.01      | 0.10      |
| HALLMARK_HEME_METABOLISM           | -0.29 | -1.31 | 0.02      | 0.10      |
| HALLMARK_TGF_BETA_SIGNALING        | -0.36 | -1.30 | 0.09      | 0.10      |
| HALLMARK_IL2_STAT5_SIGNALING       | -0.29 | -1.27 | 0.05      | 0.12      |
| HALLMARK_P53_PATHWAY               | -0.26 | -1.18 | 0.09      | 0.21      |
| HALLMARK_COAGULATION               | -0.30 | -1.18 | 0.18      | 0.20      |

UP-regulated pathways

| NAME                                       | ES   | NES  | NOM p-val | FDR q-val |
|--------------------------------------------|------|------|-----------|-----------|
| HALLMARK_E2F_TARGETS                       | 0.64 | 2.57 | 0.00      | 0.00      |
| HALLMARK_G2M_CHECKPOINT                    | 0.52 | 2.11 | 0.00      | 0.00      |
| HALLMARK_EPITHELIAL_MESENCHYMAL_TRANSITION | 0.54 | 2.08 | 0.00      | 0.00      |
| HALLMARK_MYC_TARGETS_V2                    | 0.61 | 2.08 | 0.00      | 0.00      |
| HALLMARK_MYC_TARGETS_V1                    | 0.46 | 1.88 | 0.00      | 0.00      |
| HALLMARK_KRAS_SIGNALING_DN                 | 0.43 | 1.56 | 0.00      | 0.03      |
| HALLMARK_HEDGEHOG_SIGNALING                | 0.52 | 1.54 | 0.04      | 0.04      |
| HALLMARK_KRAS_SIGNALING_UP                 | 0.40 | 1.53 | 0.01      | 0.04      |
| HALLMARK_ANGIOGENESIS                      | 0.52 | 1.47 | 0.06      | 0.05      |
| HALLMARK_WNT_BETA_CATENIN_SIGNALING        | 0.47 | 1.44 | 0.04      | 0.06      |
| HALLMARK_INFLAMMATORY_RESPONSE             | 0.36 | 1.33 | 0.07      | 0.16      |
| HALLMARK_INTERFERON_ALPHA_RESPONSE         | 0.37 | 1.31 | 0.08      | 0.16      |

## Suppl. Table S3

VCaP.daroHigh.R1881.08h

UP-regulated pathways

| NAME                               | ES   | NES  | NOM p- |           |
|------------------------------------|------|------|--------|-----------|
|                                    |      |      | val    | FDR q-val |
| HALLMARK_MYC_TARGETS_V2            | 0.52 | 1.72 | 0.00   | 0.02      |
| HALLMARK_INTERFERON_ALPHA_RESPONSE | 0.51 | 1.71 | 0.00   | 0.01      |
| HALLMARK_KRAS_SIGNALING_UP         | 0.40 | 1.47 | 0.01   | 0.12      |
| HALLMARK_INTERFERON_GAMMA_RESPONSE | 0.38 | 1.42 | 0.02   | 0.15      |

DOWN-regulated pathways

| NAME                               | ES    | NES   | NOM p- |           |
|------------------------------------|-------|-------|--------|-----------|
|                                    |       |       | val    | FDR q-val |
| HALLMARK_ANDROGEN_RESPONSE         | -0.70 | -2.59 | 0.00   | 0.00      |
| HALLMARK_UNFOLDED_PROTEIN_RESPONSE | -0.53 | -1.98 | 0.00   | 0.00      |
| HALLMARK_PROTEIN_SECRETION         | -0.53 | -1.93 | 0.00   | 0.00      |
| HALLMARK_HYPOXIA                   | -0.47 | -1.85 | 0.00   | 0.00      |
| HALLMARK_CHOLESTEROL_HOMEOSTASIS   | -0.50 | -1.70 | 0.00   | 0.01      |
| HALLMARK_PI3K_AKT_MTOR_SIGNALING   | -0.44 | -1.60 | 0.00   | 0.02      |
| HALLMARK_UV_RESPONSE_UP            | -0.41 | -1.56 | 0.01   | 0.03      |
| HALLMARK_MTORC1_SIGNALING          | -0.37 | -1.47 | 0.00   | 0.06      |
| HALLMARK_TNFA_SIGNALING_VIA_NFKB   | -0.37 | -1.44 | 0.01   | 0.07      |
| HALLMARK_MITOTIC_SPINDLE           | -0.35 | -1.43 | 0.00   | 0.07      |
| HALLMARK_APICAL_JUNCTION           | -0.35 | -1.37 | 0.02   | 0.11      |
| HALLMARK_GLYCOLYSIS                | -0.34 | -1.35 | 0.01   | 0.11      |
| HALLMARK_ESTROGEN_RESPONSE_LATE    | -0.34 | -1.33 | 0.03   | 0.12      |
| HALLMARK_ESTROGEN_RESPONSE_EARLY   | -0.32 | -1.29 | 0.06   | 0.15      |
| HALLMARK_APOPTOSIS                 | -0.34 | -1.28 | 0.09   | 0.16      |
| HALLMARK_OXIDATIVE_PHOSPHORYLATION | -0.31 | -1.25 | 0.07   | 0.17      |

## Suppl. Table S4

VCaP.daroLow.R1881.22h

UP-regulated pathways

| NAME                                       | ES   | NES  | NOM p-<br>val | FDR q-<br>val |
|--------------------------------------------|------|------|---------------|---------------|
| HALLMARK_E2F_TARGETS                       | 0.71 | 2.86 | 0.00          | 0.00          |
| HALLMARK_G2M_CHECKPOINT                    | 0.61 | 2.47 | 0.00          | 0.00          |
| HALLMARK_MYC_TARGETS_V2                    | 0.65 | 2.20 | 0.00          | 0.00          |
| HALLMARK_EPITHELIAL_MESENCHYMAL_TRANSITION | 0.55 | 2.11 | 0.00          | 0.00          |
| HALLMARK_MYC_TARGETS_V1                    | 0.51 | 2.05 | 0.00          | 0.00          |
| HALLMARK_KRAS_SIGNALING_DN                 | 0.44 | 1.60 | 0.00          | 0.02          |
| HALLMARK_ANGIOGENESIS                      | 0.57 | 1.59 | 0.02          | 0.02          |
| HALLMARK_WNT_BETA_CATENIN_SIGNALING        | 0.47 | 1.44 | 0.05          | 0.09          |
| HALLMARK_KRAS_SIGNALING_UP                 | 0.38 | 1.41 | 0.03          | 0.10          |
| HALLMARK_HEDGEHOG_SIGNALING                | 0.45 | 1.36 | 0.11          | 0.14          |
| HALLMARK_INTERFERON_ALPHA_RESPONSE         | 0.39 | 1.35 | 0.08          | 0.13          |
| HALLMARK_DNA_REPAIR                        | 0.33 | 1.30 | 0.06          | 0.19          |
| HALLMARK_MITOTIC_SPINDLE                   | 0.32 | 1.29 | 0.05          | 0.18          |

DOWN-regulated pathways

| NAME                               | ES    | NES   | NOM p-<br>val | FDR q-<br>val |
|------------------------------------|-------|-------|---------------|---------------|
| HALLMARK_ANDROGEN_RESPONSE         | -0.73 | -3.04 | 0.00          | 0.00          |
| HALLMARK_PROTEIN_SECRETION         | -0.51 | -2.17 | 0.00          | 0.00          |
| HALLMARK_TNFA_SIGNALING_VIA_NFKB   | -0.37 | -1.69 | 0.00          | 0.02          |
| HALLMARK_HYPOXIA                   | -0.37 | -1.69 | 0.00          | 0.02          |
| HALLMARK_CHOLESTEROL_HOMEOSTASIS   | -0.42 | -1.67 | 0.00          | 0.02          |
| HALLMARK_FATTY_ACID_METABOLISM     | -0.35 | -1.57 | 0.00          | 0.03          |
| HALLMARK_PI3K_AKT_MTOR_SIGNALING   | -0.37 | -1.53 | 0.01          | 0.03          |
| HALLMARK_UNFOLDED_PROTEIN_RESPONSE | -0.34 | -1.50 | 0.01          | 0.04          |
| HALLMARK_HEME_METABOLISM           | -0.32 | -1.45 | 0.00          | 0.05          |
| HALLMARK_BILE_ACID_METABOLISM      | -0.35 | -1.43 | 0.02          | 0.05          |
| HALLMARK_ESTROGEN_RESPONSE_LATE    | -0.30 | -1.37 | 0.01          | 0.07          |
| HALLMARK_ESTROGEN_RESPONSE_EARLY   | -0.30 | -1.36 | 0.01          | 0.07          |
| HALLMARK_TGF_BETA_SIGNALING        | -0.36 | -1.32 | 0.06          | 0.09          |
| HALLMARK_OXIDATIVE_PHOSPHORYLATION | -0.27 | -1.24 | 0.03          | 0.14          |
| HALLMARK_ADIPOGENESIS              | -0.27 | -1.23 | 0.07          | 0.15          |
| HALLMARK_XENOBIOTIC_METABOLISM     | -0.27 | -1.19 | 0.08          | 0.18          |
| HALLMARK_IL2_STAT5_SIGNALING       | -0.26 | -1.17 | 0.14          | 0.20          |

## Suppl. Table S5

### VCaP.daroLow.R1881.08h

#### UP-regulated pathways

| NAME                                       | ES | NES  | NOM p-val | FDR q-val |      |
|--------------------------------------------|----|------|-----------|-----------|------|
| HALLMARK_INTERFERON_ALPHA_RESPONSE         |    | 0.51 | 1.79      | 0.00      | 0.01 |
| HALLMARK_KRAS_SIGNALING_UP                 |    | 0.46 | 1.73      | 0.00      | 0.01 |
| HALLMARK_INTERFERON_GAMMA_RESPONSE         |    | 0.41 | 1.60      | 0.00      | 0.03 |
| HALLMARK_INFLAMMATORY_RESPONSE             |    | 0.40 | 1.48      | 0.01      | 0.08 |
| HALLMARK_NOTCH_SIGNALING                   |    | 0.46 | 1.38      | 0.09      | 0.17 |
| HALLMARK_ALLOGRAFT_REJECTION               |    | 0.38 | 1.38      | 0.05      | 0.14 |
| HALLMARK_EPITHELIAL_MESENCHYMAL_TRANSITION |    | 0.36 | 1.37      | 0.03      | 0.13 |
| HALLMARK_IL6_JAK_STAT3_SIGNALING           |    | 0.42 | 1.34      | 0.10      | 0.14 |
| HALLMARK_APICAL_SURFACE                    |    | 0.45 | 1.30      | 0.13      | 0.17 |
| HALLMARK_E2F_TARGETS                       |    | 0.31 | 1.27      | 0.04      | 0.19 |

#### DOWN-regulated pathways

| NAME                               | ES | NES   | NOM p-val | FDR q-val |      |
|------------------------------------|----|-------|-----------|-----------|------|
| HALLMARK_UNFOLDED_PROTEIN_RESPONSE |    | -0.58 | -2.21     | 0.00      | 0.00 |
| HALLMARK_ANDROGEN_RESPONSE         |    | -0.56 | -2.08     | 0.00      | 0.00 |
| HALLMARK_PROTEIN_SECRETION         |    | -0.47 | -1.77     | 0.00      | 0.01 |
| HALLMARK_HYPOXIA                   |    | -0.44 | -1.74     | 0.00      | 0.01 |
| HALLMARK_UV_RESPONSE_UP            |    | -0.44 | -1.72     | 0.00      | 0.01 |
| HALLMARK_CHOLESTEROL_HOMEOSTASIS   |    | -0.48 | -1.72     | 0.00      | 0.01 |
| HALLMARK_OXIDATIVE_PHOSPHORYLATION |    | -0.36 | -1.52     | 0.00      | 0.04 |
| HALLMARK_MTORC1_SIGNALING          |    | -0.35 | -1.48     | 0.00      | 0.05 |
| HALLMARK_APICAL_JUNCTION           |    | -0.36 | -1.42     | 0.01      | 0.07 |
| HALLMARK_MITOTIC_SPINDLE           |    | -0.34 | -1.42     | 0.00      | 0.07 |
| HALLMARK_ESTROGEN_RESPONSE_LATE    |    | -0.34 | -1.38     | 0.01      | 0.09 |
| HALLMARK_TNFA_SIGNALING_VIA_NFKB   |    | -0.34 | -1.37     | 0.02      | 0.09 |
| HALLMARK_ESTROGEN_RESPONSE_EARLY   |    | -0.33 | -1.34     | 0.03      | 0.11 |
| HALLMARK_GLYCOLYSIS                |    | -0.33 | -1.34     | 0.03      | 0.10 |
| HALLMARK_PI3K_AKT_MTOR_SIGNALING   |    | -0.36 | -1.31     | 0.07      | 0.12 |

## Suppl. Table S6

LAPC4.daroHigh.R1881.22h

DOWN-regulated pathways

| NAME                                     | ES | NES   | NOM p-val | FDR q-val |      |
|------------------------------------------|----|-------|-----------|-----------|------|
| HALLMARK_ANDROGEN_RESPONSE               |    | -0.74 | -2.57     | 0.00      | 0.00 |
| HALLMARK_MYC_TARGETS_V2                  |    | -0.74 | -2.37     | 0.00      | 0.00 |
| HALLMARK_ESTROGEN_RESPONSE_EARLY         |    | -0.53 | -1.98     | 0.00      | 0.00 |
| HALLMARK_KRAS_SIGNALING_DN               |    | -0.58 | -1.97     | 0.00      | 0.00 |
| HALLMARK_E2F_TARGETS                     |    | -0.51 | -1.93     | 0.00      | 0.00 |
| HALLMARK_ESTROGEN_RESPONSE_LATE          |    | -0.50 | -1.84     | 0.00      | 0.00 |
| HALLMARK_G2M_CHECKPOINT                  |    | -0.44 | -1.68     | 0.00      | 0.02 |
| HALLMARK_HEDGEHOG_SIGNALING              |    | -0.61 | -1.61     | 0.03      | 0.03 |
| HALLMARK_MYC_TARGETS_V1                  |    | -0.41 | -1.56     | 0.00      | 0.04 |
| HALLMARK_WNT_BETA_CATENIN_SIGNALING      |    | -0.52 | -1.52     | 0.03      | 0.06 |
| HALLMARK_BILE_ACID_METABOLISM            |    | -0.45 | -1.50     | 0.03      | 0.07 |
| HALLMARK_REACTIVE_OXIGEN_SPECIES_PATHWAY |    | -0.50 | -1.47     | 0.04      | 0.07 |
| HALLMARK_MTORC1_SIGNALING                |    | -0.38 | -1.47     | 0.01      | 0.07 |
| HALLMARK_UNFOLDED_PROTEIN_RESPONSE       |    | -0.40 | -1.40     | 0.04      | 0.10 |
| HALLMARK_FATTY_ACID_METABOLISM           |    | -0.36 | -1.30     | 0.05      | 0.21 |
| HALLMARK_CHOLESTEROL_HOMEOSTASIS         |    | -0.40 | -1.30     | 0.09      | 0.20 |
| HALLMARK_XENOBIOTIC_METABOLISM           |    | -0.36 | -1.29     | 0.07      | 0.19 |

UP-regulated pathways

| NAME                           | ES | NES  | NOM p-val | FDR q-val |      |
|--------------------------------|----|------|-----------|-----------|------|
| HALLMARK_COAGULATION           |    | 0.41 | 1.41      | 0.02      | 0.32 |
| HALLMARK_INFLAMMATORY_RESPONSE |    | 0.38 | 1.40      | 0.02      | 0.18 |
| HALLMARK_COMPLEMENT            |    | 0.36 | 1.38      | 0.04      | 0.14 |

## Suppl. Table S7

LAPC4.daroHigh.R1881.8h

### DOWN-regulated pathways

| NAME                             | ES | NES   | NOM p-val | FDR q-val |      |
|----------------------------------|----|-------|-----------|-----------|------|
| HALLMARK_ANDROGEN_RESPONSE       |    | -0.69 | -2.31     | 0.00      | 0.00 |
| HALLMARK_ESTROGEN_RESPONSE_EARLY |    | -0.48 | -1.74     | 0.00      | 0.02 |
| HALLMARK_KRAS_SIGNALING_DN       |    | -0.46 | -1.51     | 0.02      | 0.17 |

### UP-regulated pathways

| NAME                               | ES | NES  | NOM p-val | FDR q-val |      |
|------------------------------------|----|------|-----------|-----------|------|
| HALLMARK_INTERFERON_ALPHA_RESPONSE |    | 0.50 | 1.70      | 0.01      | 0.03 |
| HALLMARK_INFLAMMATORY_RESPONSE     |    | 0.40 | 1.43      | 0.03      | 0.18 |
| HALLMARK_APOPTOSIS                 |    | 0.37 | 1.40      | 0.02      | 0.15 |

## Suppl. Table S8

### LAPC4.daroLow.R1881.22h DOWN-regulated pathways

| NAME                                     | ES    | NES   | NOM p-<br>val | FDR q-val |
|------------------------------------------|-------|-------|---------------|-----------|
| HALLMARK_ANDROGEN_RESPONSE               | -0.76 | -2.71 | 0.00          | 0.00      |
| HALLMARK_MYC_TARGETS_V2                  | -0.71 | -2.29 | 0.00          | 0.00      |
| HALLMARK_MYC_TARGETS_V1                  | -0.55 | -2.15 | 0.00          | 0.00      |
| HALLMARK_E2F_TARGETS                     | -0.54 | -2.12 | 0.00          | 0.00      |
| HALLMARK_ESTROGEN_RESPONSE_LATE          | -0.50 | -1.90 | 0.00          | 0.00      |
| HALLMARK_KRAS_SIGNALING_DN               | -0.53 | -1.86 | 0.00          | 0.00      |
| HALLMARK_G2M_CHECKPOINT                  | -0.45 | -1.77 | 0.00          | 0.00      |
| HALLMARK_ESTROGEN_RESPONSE_EARLY         | -0.46 | -1.76 | 0.00          | 0.00      |
| HALLMARK_MTORC1_SIGNALING                | -0.43 | -1.65 | 0.00          | 0.02      |
| HALLMARK_REACTIVE_OXIGEN_SPECIES_PATHWAY | -0.52 | -1.57 | 0.02          | 0.03      |
| HALLMARK_UNFOLDED_PROTEIN_RESPONSE       | -0.42 | -1.52 | 0.01          | 0.04      |
| HALLMARK_HEDGEHOG_SIGNALING              | -0.51 | -1.36 | 0.11          | 0.13      |
| HALLMARK_FATTY_ACID_METABOLISM           | -0.36 | -1.34 | 0.04          | 0.14      |
| HALLMARK_BILE_ACID_METABOLISM            | -0.40 | -1.33 | 0.05          | 0.14      |
| HALLMARK_XENOBIOTIC_METABOLISM           | -0.35 | -1.32 | 0.06          | 0.14      |
| HALLMARK_WNT_BETA_CATENIN_SIGNALING      | -0.44 | -1.28 | 0.13          | 0.17      |
| HALLMARK_ALLOGRAFT_REJECTION             | -0.36 | -1.26 | 0.11          | 0.18      |

### UP-regulated pathways

| NAME                                       | ES   | NES  | NOM p-<br>val | FDR q-val |
|--------------------------------------------|------|------|---------------|-----------|
| HALLMARK_COAGULATION                       | 0.49 | 1.61 | 0.00          | 0.06      |
| HALLMARK_INTERFERON_ALPHA_RESPONSE         | 0.45 | 1.48 | 0.02          | 0.13      |
| HALLMARK_INFLAMMATORY_RESPONSE             | 0.42 | 1.45 | 0.02          | 0.12      |
| HALLMARK_APOPTOSIS                         | 0.40 | 1.45 | 0.02          | 0.09      |
| HALLMARK_EPITHELIAL_MESENCHYMAL_TRANSITION | 0.40 | 1.44 | 0.02          | 0.07      |
| HALLMARK_MYOGENESIS                        | 0.39 | 1.39 | 0.02          | 0.11      |

## Suppl. Table S9

LAPC4.daroLow.R1881.8h

DOWN-regulated pathways

| NAME                       | ES | NES   | NOM p-val | FDR q-val |      |
|----------------------------|----|-------|-----------|-----------|------|
| HALLMARK_ANDROGEN_RESPONSE |    | -0.66 | -2.18     | 0.00      | 0.00 |

UP-regulated pathways

| NAME                               | ES | NES  | NOM p-val | FDR q-val |      |
|------------------------------------|----|------|-----------|-----------|------|
| HALLMARK_INTERFERON_ALPHA_RESPONSE |    | 0.58 | 1.88      | 0.00      | 0.00 |
| HALLMARK_IL6_JAK_STAT3_SIGNALING   |    | 0.57 | 1.67      | 0.00      | 0.02 |
| HALLMARK_INTERFERON_GAMMA_RESPONSE |    | 0.44 | 1.58      | 0.00      | 0.04 |
| HALLMARK_COMPLEMENT                |    | 0.38 | 1.35      | 0.04      | 0.20 |





# Suppl. Table S11

## VCaP

### cluster 1 DMSO R1881 Daro

|                                                                                                                   |                      |       |
|-------------------------------------------------------------------------------------------------------------------|----------------------|-------|
| MSigDB Perturbation                                                                                               | log10(Binom. p-val.) |       |
| Genes up-regulated in LNCAP cells in response to synthetic androgen R1881                                         |                      | 28.66 |
| Genes up-regulated in MDA-MB-453 cells (class A ER(-)) after exposure to the androgen R1881                       |                      | 15.58 |
| Genes up-regulated in prostate cancer samples                                                                     |                      | 13.99 |
| Up-regulated genes in the left ventricle myocardium of patients with heart failure following implantation of LVAD |                      | 11.69 |
| Genes up-regulated in hepatocellular carcinoma induced by ciprofibrate                                            |                      | 10.94 |

### MSigDB Pathway

|                                                                       |                      |      |
|-----------------------------------------------------------------------|----------------------|------|
| FOXA1 transcription factor network                                    | log10(Binom. p-val.) | 9.92 |
| Genes involved in NOTCH1 intracellular domain regulated transcription |                      | 9.85 |
| Notch-mediated HES/HEY network                                        |                      | 7.99 |
| Mechanism of gene regulation by PPARa(alpha)                          |                      | 7.91 |

### cluster 2 R1881 Daro

|                                                                                                                                                            |                      |      |
|------------------------------------------------------------------------------------------------------------------------------------------------------------|----------------------|------|
| MSigDB Perturbation                                                                                                                                        | log10(Binom. p-val.) |      |
| Genes up-regulated in LNCAP cells in response to synthetic androgen R1881                                                                                  |                      | 5.36 |
| Genes up-regulated in H1975 cells resistant to gefitinib after treatment with EGFR inhibitor for 24h                                                       |                      | 5.11 |
| Up-regulated genes in the left ventricle myocardium of patients with heart failure following implantation of LVAD                                          |                      | 5.04 |
| Cluster 9: genes up-regulated in SW260 cells by sodium butyrate and TSA with the same kinetics with which each alters the level of histone H4 acetylation. |                      | 4.97 |
| Genes up-regulated in constitutively invasive HT-29 5M21 cells vs those expressing functionally inactive TATI                                              |                      | 4.87 |

### MSigDB Pathway

|                             |                      |     |
|-----------------------------|----------------------|-----|
| TGF-beta receptor signaling | log10(Binom. p-val.) | 5.4 |
|-----------------------------|----------------------|-----|

### cluster 3 R1881 DMSO

|                                    |                      |   |
|------------------------------------|----------------------|---|
| MSigDB Pathway                     | log10(Binom. p-val.) |   |
| FOXA1 transcription factor network |                      | 6 |

### cluster 4 R1881

|                                                                                                                                   |                      |       |
|-----------------------------------------------------------------------------------------------------------------------------------|----------------------|-------|
| MSigDB Perturbation                                                                                                               | log10(Binom. p-val.) |       |
| Top genes up-regulated in liver tissue from mice with knockout of ZMPSTE24                                                        |                      | 27.47 |
| Genes down-regulated in 3T3-L1 cells (adipocyte) by insulin but displayed blunted response to insulin the insulin resistant cells |                      | 11.34 |
| Classic adipogenic genes (group1) that are induced by PPARG during adipogenesis in 3T3-L1 preadipocytes                           |                      | 9.71  |
| STAT3 targets in hematopoietic signaling                                                                                          |                      | 9.69  |
| Genes up-regulated in U937 cells (acute promyelocytic leukemia, APL) by retinoin (ATRA)                                           |                      | 9.33  |

### cluster 5 DMSO

|                                                       |                      |      |
|-------------------------------------------------------|----------------------|------|
| MSigDB Pathway                                        | log10(Binom. p-val.) |      |
| Genes involved in downstream signal transduction      |                      | 5.41 |
| Validated targets of C-MAX transcriptional repression |                      | 4.72 |
| Acute myeloid leukemia                                |                      | 4.18 |
| Genes in prolonged ERK activation events              |                      | 3.66 |
| Class I PI3K signaling events mediated by Akt         |                      | 3.63 |
| Genes involved in PI3K/AKT activation                 |                      | 3.21 |

## LAPC4

### cluster 4 R1881

|                                                                                                                                                                     |                      |       |
|---------------------------------------------------------------------------------------------------------------------------------------------------------------------|----------------------|-------|
| MSigDB Perturbation                                                                                                                                                 | log10(Binom. p-val.) |       |
| Genes up-regulated in LNCAP cells in response to synthetic androgen R1881                                                                                           |                      | 18.65 |
| Genes up-regulated in MDA-MB-453 cells (class A ER(-)) after exposure to the androgen R1881                                                                         |                      | 18.05 |
| Genes up-regulated in prostate tumor vs normal tissue samples                                                                                                       |                      | 9     |
| Genes up-regulated in ER(-) / PR(-) breast tumors with molecular similarity to ER(+) (class A) relative to the rest of the ER(-) / PR(-) samples                    |                      | 9.74  |
| Genes down-regulated in HMLE cells after loss of function of CDH1, which was achieved either by RNAi knockdown or by expression of a dominant-negative form of CDH1 |                      | 7.56  |

## Suppl. Table S12

### VCaP - SE associated:

| Disease Ontology            | log10 binom p val |
|-----------------------------|-------------------|
| 1 Thyroid Gland Disease     | 7.16              |
| 2 Prostate Disease          | 6.89              |
| 3 Neck Cancer               | 6.7               |
| 4 Neck Neoplasm             | 6.66              |
| 5 Endometrial Carcinoma     | 6.58              |
| 6 Cancer of Urinary Tract   | 5.98              |
| 7 Gastrointestinal Neoplasm | 5.83              |
| 8 Kidney Neoplasm           | 5.74              |
| 9 Digestive System Cancer   | 5.64              |
| 10 Prostatic Neoplasm       | 5.54              |
| 11 Bladder Disease          | 5.52              |

| MSigDB Perturbation                                                                                                             | log10 binom p val |
|---------------------------------------------------------------------------------------------------------------------------------|-------------------|
| 1 Genes up-regulated in LNCAP cells in response to synthetic androgen R1881                                                     | 17.56             |
| 2 Genes up-regulated in luminal-like breast cancer cell lines compared to the mesenchymal-like ones                             | 9.59              |
| 3 Genes up-regulated in poorly differentiated thyroid carcinoma compared to normal thyroid tissue                               | 9.24              |
| 4 The group 5 set of genes associated with acquired endocrine therapy resistance in breast tumors expressing ESR1 but not ERBB2 | 8.26              |
| 5 Class I of genes transiently induced by EGF in 184A1 cells                                                                    | 7.95              |
| 6 Genes up-regulated in prostate cancer samples                                                                                 | 7.79              |
| 7 Up-regulated genes in the left ventricle myocardium of patients with heart failure                                            | 7.71              |
| 8 Genes up-regulated in hepatocellular induced by ciprofibrate                                                                  | 7.63              |
